# Supplementary material for: Molecular insights into the binding variance of the SARS-CoV-2 spike with human, cat and dog ACE2 proteins
Source: Royal Society of Chemistry journal article supplement (doi:10.1039/d1cp01611c), 2021-01-01
Supplement: d1cp01611c1.pdf [file d1cp01611c1.pdf]

## Supplemental Information

# Molecular insights into the binding variance of SARS-CoV-2 spike with human, cat and dog ACE2 proteins

*Yongjian Zang,<sup>a</sup> Xuhua Li,<sup>a</sup> Yizhen Zhao,<sup>a</sup> He Wang,<sup>a</sup> Dongxiao Hao,<sup>a</sup> Lei Zhang,<sup>a</sup> Zhiwei  
Yang,<sup>\*a</sup> Xiaohui Yuan,<sup>b</sup> Shengli Zhang<sup>\*a</sup>*

---

<sup>a</sup> MOE Key Laboratory for Nonequilibrium Synthesis and Modulation of Condensed Matter, School of Physics,  
Xi'an Jiaotong University, Xi'an 710049, China

<sup>b</sup> Institute of Biomedicine, Jinan University, Guangzhou 510632, China

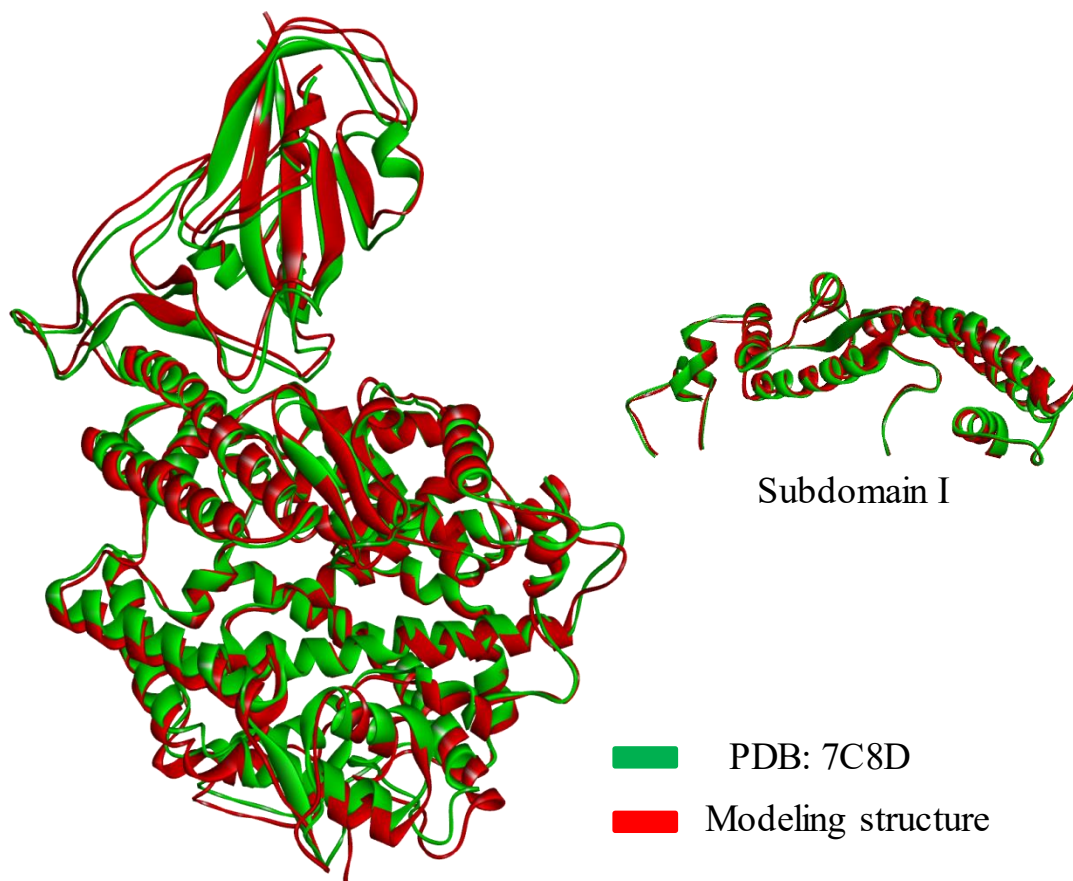

**Fig. S1.** The structure of Cat ACE2 was conducted by the MODELER module. The cryo-EM structure of cACE2-RBD (PDB: 7C8D) was released during the manuscript preparation. The modeling structure (in red) is almost entirely accord with the cryo-EM structure (in green), especially subdomain I that interacts with spike RBD, with the heavy-atom root mean square deviation (RMSD) of 0.823 Å

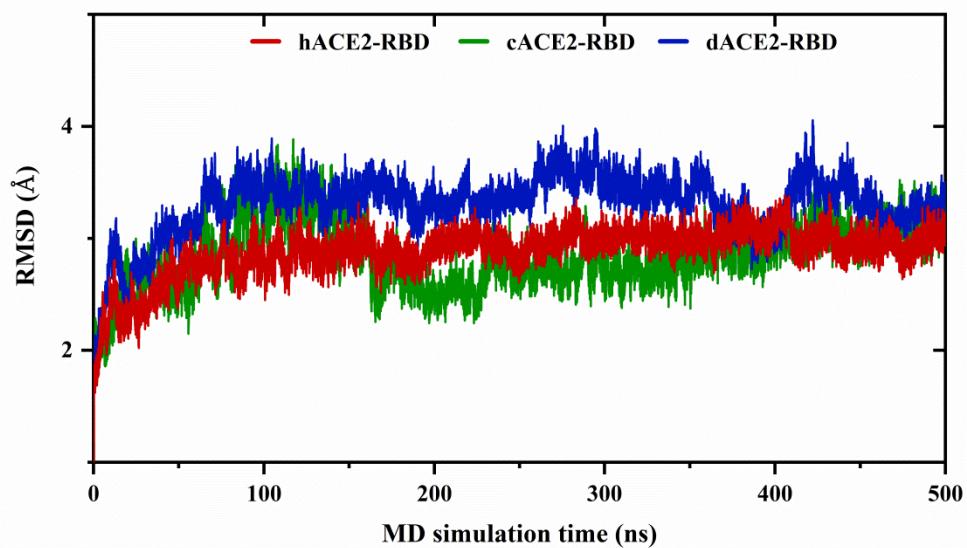

**Fig. S2.** Variation of the backbone-atom root-mean-square deviations (RMSD) for the h/c/dACE2-RBD complexes during the 500-ns MD simulations.

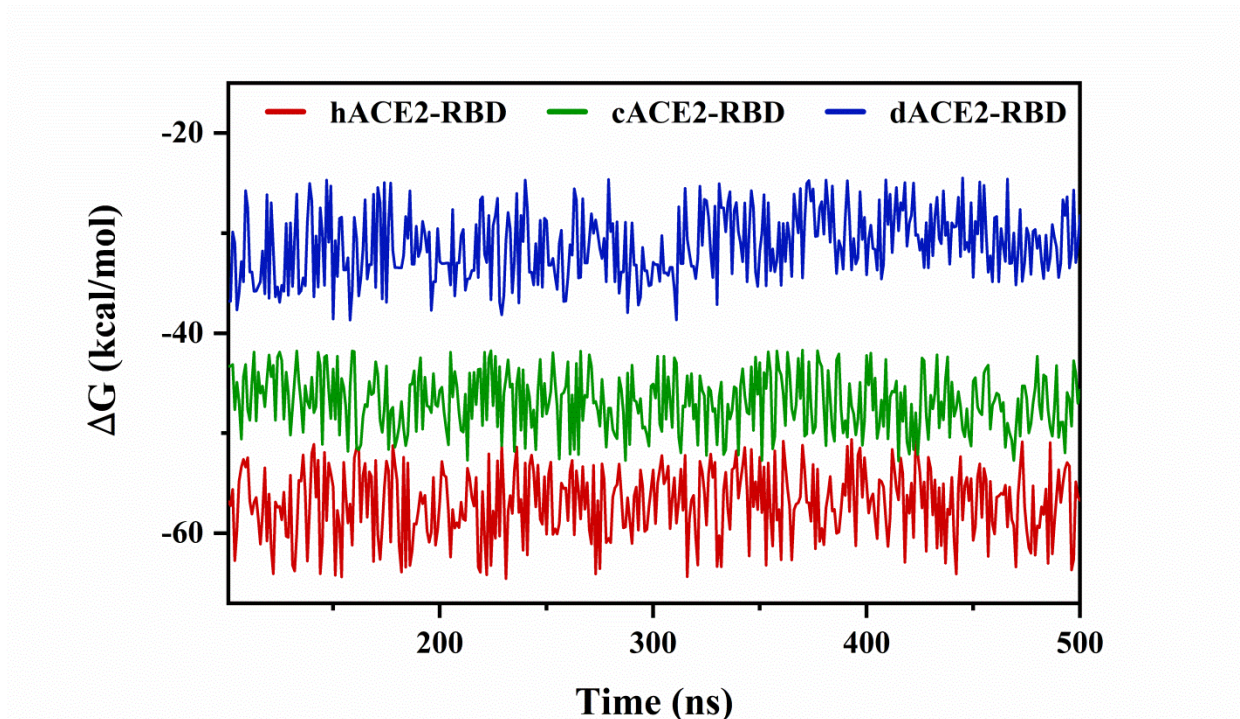

**Fig. S3.** Variation of the binding free energies (kcal/mol) for h/c/dACE2-RBD complexes over 100-500 ns MD trajectories.

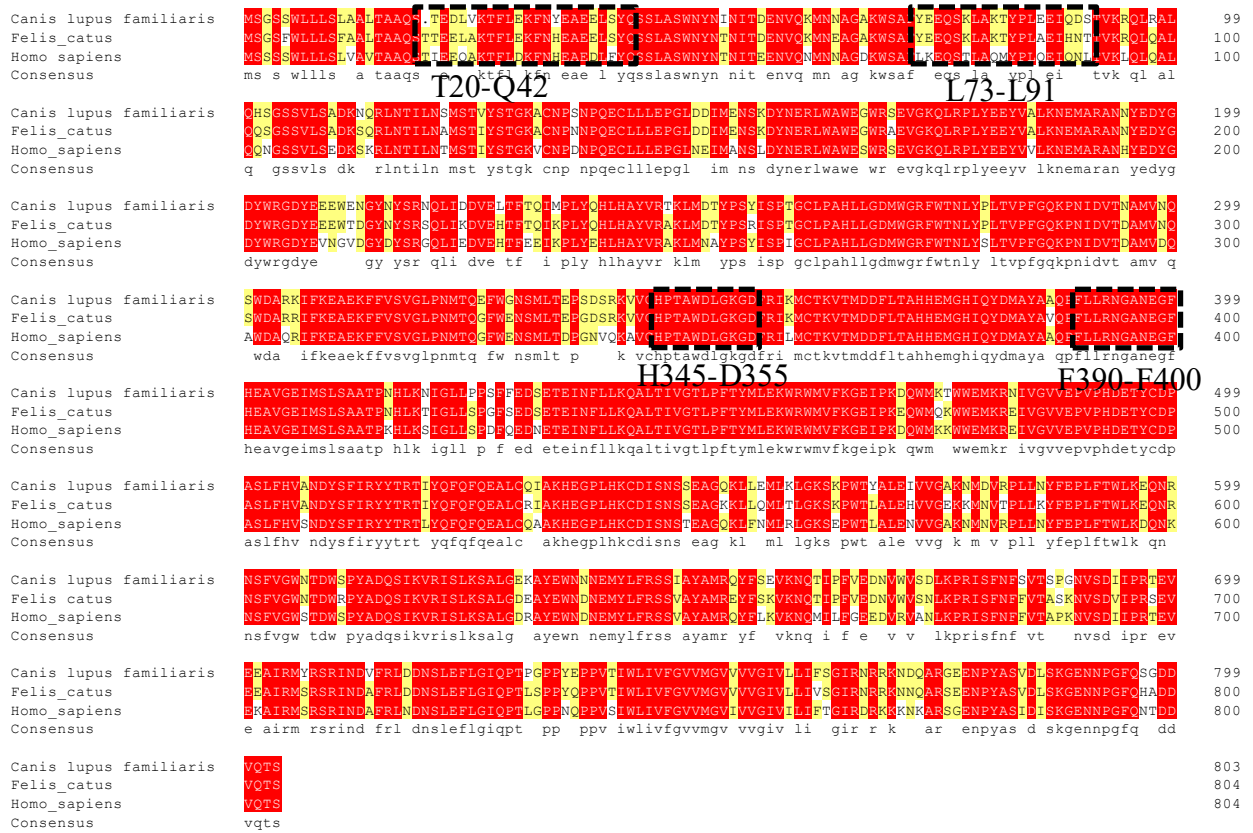

**Fig. S4.** The multiple sequence alignment for the ACE2 proteins derived from human (Homo sapiens, BAB40370) and cat (Felis catus, AAX59005) and dog (Canis lupus familiaris, NP\_001158732). The sequence numbering refers to the human ACE2 sequence. The same amino acids are highlighted by the colored bars. The dotted boxes mark the regions that interact with SARS-CoV-2 RBD.

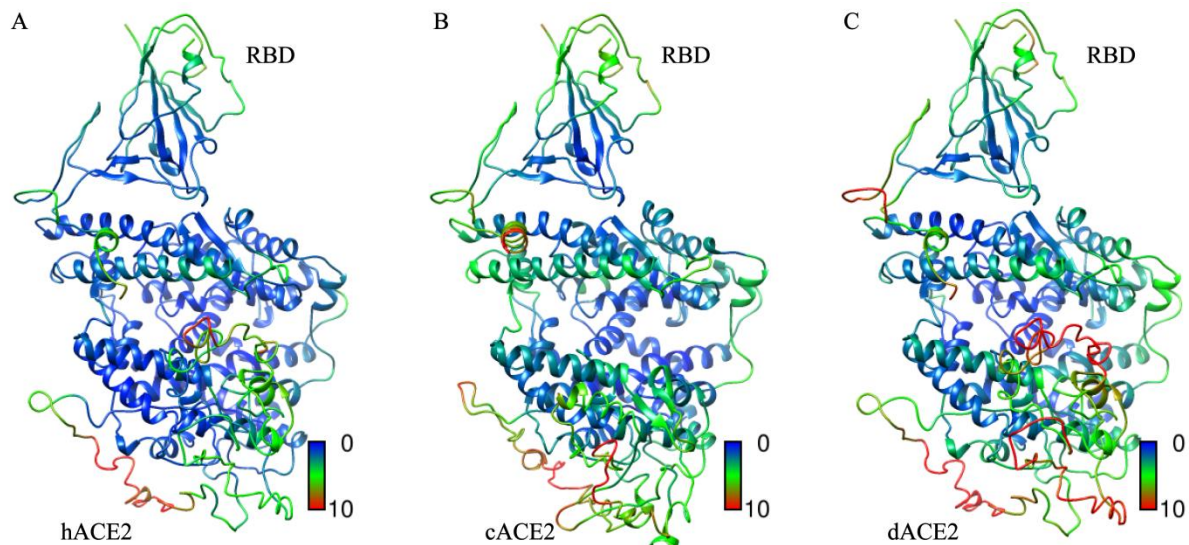

**Fig. S5.** The root means square fluctuations (RMSF) of  $C\alpha$  atoms of the hACE2-RBD, cACE2-RBD and dACE2-RBD complexes were mapped onto each surface, the colors of residues are according to the RMSF values. (units in Å)

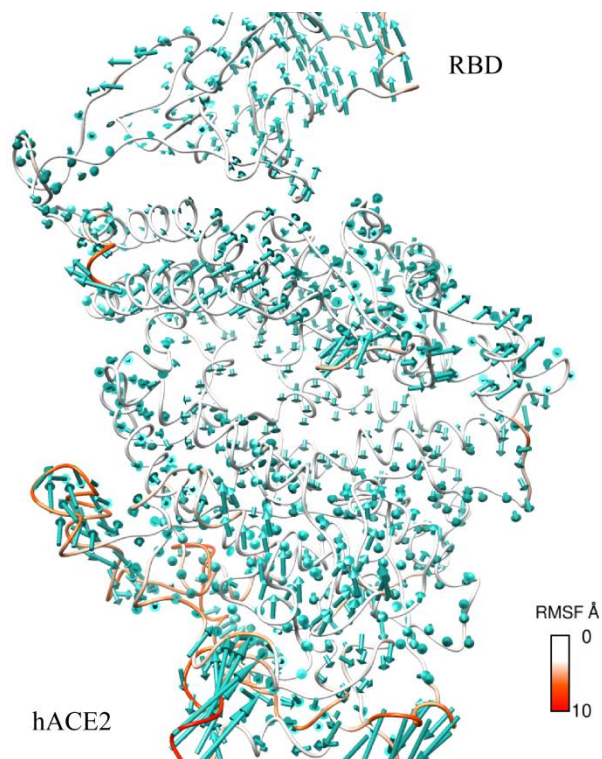

**Fig. S6.** The large principal component of the hACE2-RBD complex based on the two independent 200-ns MD simulations with the initial structure 7KNB. Light sea green arrows point from one end to the other. The colors of residues are according to the RMSF values. (units in Å)
